# Supplementary material for: Impact of COVID-19 pandemic on emergency department visits and infant health: a scoping review protocol
Source: HighWire-hosted journal article supplement (doi:10.1136/bmjopen-2022-061778), 2022-07-01
Supplement: bmjopen-2022-061778supp001_data_supplement.pdf [file bmjopen-2022-061778supp001_data_supplement.pdf]

## Appendix 1: Search Strategies

### 1.1 Search Strategy COVID-19 Emergency Department Visits

**Embase Classic+Embase** <1947 to 2021 June 22>

Ovid MEDLINE(R) ALL <1946 to June 22, 2021>

- 1 COVID-19/
- 2 (exp coronavirus/ or coronavirus\*.mp. or corona virus\*.mp.) and (wuhan or beijing or shanghai or hubei).mp.
- 3 ((coronavirus\* or corona virus\* or coronavirus\* or coronaviridae or coronaviridae or betacoronavirus\*) adj3 ("19" or "2019")).tw.
- 4 covid.tw,kw.
- 5 covid19.tw,kw. or covid 19.kw.
- 6 sars cov 2.tw,kw.
- 7 (ncov or n cov).tw,kw.
- 8 (novel coronavirus\* or novel corona virus\*).tw,kw.
- 9 (CoV 2 or CoV2 or sarscov2 or 2019nCoV or novel CoV or wuhan virus\*).tw,kw.
- 10 (Coronavirus Infections/ or Severe Acute Respiratory Syndrome/) and (Pandemics/ or pandemic\*.tw,kf.)
- 11 or/1-
- 12 exp Emergency Service, Hospital/
- 13 emergency department\*.tw,kf.
- 14 (emergency room\* or emergency visit\* or ed visit\*).tw,kf. or emergenc\*.ti.
- 15 or/12-14
- 16 11 and 15
- 17 infant/ or infant, newborn/
- 18 (infant\* or baby or babies or neonat\* or newborn\*).tw,kf.
- 19 17 or 18
- 20 16 and 19
- 21 **20 use medall Medline**
- 22 coronavirus disease 2019/
- 23 (Coronavirinae/ or coronavirus\*.mp. or corona virus\*.mp.) and (wuhan or beijing or shanghai or hubei).mp.
- 24 ((coronavirus\* or corona virus\* or coronavirus\* or coronaviridae or coronaviridae or betacoronavirus\*) adj3 ("19" or "2019")).tw.
- 25 (covid or covid19).tw.
- 26 sars cov 2.tw.
- 27 (ncov or n cov).tw.
- 28 (novel coronavirus\* or novel corona virus\*).tw.
- 29 (CoV 2 or CoV2 or sarscov2 or 2019nCoV or novel CoV or wuhan virus).tw.
- 30 (coronavirus infection/ or severe acute respiratory syndrome/) and (pandemic/ or pandemic\*.tw.)
- 31 limit 30 to yr="2019 -Current"
- 32 or/22-29,31
- 33 exp infant/

34 (infant\* or baby or babies or neonat\* or newborn\*).tw.  
35 33 or 34  
36 32 and 35  
37 emergency ward/  
38 emergency department\*.tw.  
39 (emergency room\* or emergency visit\* or ed visit\*).tw. or emergenc\*.ti.  
40 emergency health service/  
41 or/37-40  
42 36 and 41  
**43 42 use emczd Embase**  
44 21 or 43  
45 remove duplicates from 44  
46 45 use medall  
47 45 use emczd

### Web of Science – June 23, 2021

# 7

#6 AND #5

Indexes=SCI-EXPANDED, CPCI-S, ESCI Timespan=1900-2021

# 6

TOPIC:

(infant\* or baby or babies or neonat\* or newborn\*)

Indexes=SCI-EXPANDED, CPCI-S, ESCI Timespan=1900-2021

# 5

#4 AND #3

Indexes=SCI-EXPANDED, CPCI-S, ESCI Timespan=1900-2021

# 4

TS=(emergency room\* or emergency visit\* or ed visit\* or emergency department\*) OR

TI=(emergenc\*)

OR TS=(emergency service\*)

Indexes=SCI-EXPANDED, CPCI-S, ESCI Timespan=1900-2021

# 3

#2 OR #1

Indexes=SCI-EXPANDED, CPCI-S, ESCI Timespan=1900-2021

# 2

TOPIC: (sars cov 2 OR sars cov2) OR TOPIC: (ncov or n cov)

OR TOPIC: (novel coronavirus or novel corona virus)

Indexes=SCI-EXPANDED, CPCI-S, ESCI Timespan=1900-2021

# 1

TOPIC: (covid OR covid19 or covid2019)

Indexes=SCI-EXPANDED, CPCI-S, ESCI Timespan=1900-2021

## Cinahl - June 23, 2021

Wednesday, June 23, 2021 6:25:31 PM

| #   | Query                                                                                                                                                                      |
|-----|----------------------------------------------------------------------------------------------------------------------------------------------------------------------------|
| S1  | (MH "COVID-19")                                                                                                                                                            |
| S2  | (MH "COVID-19 Pandemic")                                                                                                                                                   |
| S3  | (MH "SARS-CoV-2")                                                                                                                                                          |
| S4  | TI covid* OR AB covid* OR TI sars cov 2 OR AB sars cov 2 OR TI novel coronavirus OR AB novel coronavirus OR TI wuhan virus OR AB wuhan virus OR TI 2019nCoV OR AB 2019nCoV |
| S5  | TI ( CoV 2 or CoV2 or sarscov2 ) OR AB ( CoV 2 or CoV2 or sarscov2 )                                                                                                       |
| S6  | S1 OR S2 OR S3 OR S4 OR S5                                                                                                                                                 |
| S7  | (MH "Emergency Service+")                                                                                                                                                  |
| S8  | emergency department*                                                                                                                                                      |
| S9  | (emergency room* or emergency visit* or ed visit*)                                                                                                                         |
| S10 | TI emergenc*                                                                                                                                                               |
| S11 | (MH "Emergency Medical Services")                                                                                                                                          |
| S12 | (S7 OR S8 OR S9 OR S10 OR S11)                                                                                                                                             |
| S13 | (S6 AND S12)                                                                                                                                                               |
| S14 | (MH "Infant+")                                                                                                                                                             |
| S15 | TI ( (infant* or baby or babies or neonat* or newborn*) ) OR AB ( (infant* or baby or babies or neonat* or newborn*) )                                                     |
| S16 | S14 OR S15                                                                                                                                                                 |
| S17 | (S13 AND S16)                                                                                                                                                              |

## 1.2 Search Strategy COVID-19 Neonatal Mortality

**Embase Classic+Embase** <1947 to 2021 June 22>

Ovid MEDLINE(R) ALL <1946 to June 22, 2021>

- 1 COVID-19/
- 2 (exp coronavirus/ or coronavirus\*.mp. or corona virus\*.mp.) and (wuhan or beijing or shanghai or hubei).mp.
- 3 ((coronavirus\* or corona virus\* or coronavirus\* or coronaviridae or coronaviridae or betacoronavirus\*) adj3 ("19" or "2019")).tw.
- 4 covid.tw,kw.
- 5 covid19.tw,kw. or covid 19.kw.
- 6 sars cov 2.tw,kw.
- 7 (ncov or n cov).tw,kw.
- 8 (novel coronavirus\* or novel corona virus\*).tw,kw.
- 9 (CoV 2 or CoV2 or sarscov2 or 2019nCoV or novel CoV or wuhan virus\*).tw,kw.
- 10 (Coronavirus Infections/ or Severe Acute Respiratory Syndrome/) and (Pandemics/ or pandemic\*.tw,kf.)
- 11 or/1
- 12 exp Infant Mortality/
- 13 exp infant death/ or perinatal death/
- 14 ((infant\* or baby or babies or neonat\* or newborn\* or perinat\*) adj3 (death\* or mortalit\*).tw,kf.
- 15 12 or 13 or 14
- 16 11 and 15
- 17 **16 use medall Medline**
- 18 coronavirus disease 2019/
- 19 (Coronavirinae/ or coronavirus\*.mp. or corona virus\*.mp.) and (wuhan or beijing or shanghai or hubei).mp.
- 20 ((coronavirus\* or corona virus\* or coronavirus\* or coronaviridae or coronaviridae or betacoronavirus\*) adj3 ("19" or "2019")).tw.
- 21 (covid or covid19).tw.
- 22 sars cov 2.tw.
- 23 (ncov or n cov).tw.
- 24 (novel coronavirus\* or novel corona virus\*).tw.
- 25 (CoV 2 or CoV2 or sarscov2 or 2019nCoV or novel CoV or wuhan virus).tw.
- 26 (coronavirus infection/ or severe acute respiratory syndrome/) and (pandemic/ or pandemic\*.tw.)
- 27 limit 26 to yr="2019 -Current"
- 28 or/18-25,27
- 29 infant mortality/
- 30 newborn mortality/
- 31 perinatal mortality/
- 32 perinatal death/
- 33 ((infant\* or baby or babies or neonat\* or newborn\*) adj2 (death\* or mortalit\*).tw.

- 34 or/29-33
- 35 28 and 34
- 36 **35 use emczd Embase**
- 37 17 or 36
- 38 remove duplicates from 37
- 39 38 use medall
- 40 38 use emczd

### Web of Science – June 23, 2021

- # 5 #4 AND #3  
*Indexes=SCI-EXPANDED, CPCI-S, ESCI Timespan=1900-2021*
- # 4 **TOPIC:** ((infant\* or baby or babies or neonat\* or newborn\*) NEAR/5 (death\* or mortalit\*))  
*Indexes=SCI-EXPANDED, CPCI-S, ESCI Timespan=1900-2021*
- # 3 #2 OR #1  
*Indexes=SCI-EXPANDED, CPCI-S, ESCI Timespan=1900-2021*
- # 2 **TOPIC:** (sars cov 2 OR sars cov2) OR **TOPIC:** (ncov or n cov) OR **TOPIC:** (novel coronavirus or novel corona virus)  
*Indexes=SCI-EXPANDED, CPCI-S, ESCI Timespan=1900-2021*
- # 1 **TOPIC:** (covid OR covid19 or covid2019)  
*Indexes=SCI-EXPANDED, CPCI-S, ESCI Timespan=1900-2021*

### Cinahl – June 23, 2021

| #  | Query                                                                                                                                                                      |
|----|----------------------------------------------------------------------------------------------------------------------------------------------------------------------------|
| S1 | (MH "COVID-19")                                                                                                                                                            |
| S2 | (MH "COVID-19 Pandemic")                                                                                                                                                   |
| S3 | (MH "SARS-CoV-2")                                                                                                                                                          |
| S4 | TI covid* OR AB covid* OR TI sars cov 2 OR AB sars cov 2 OR TI novel coronavirus OR AB novel coronavirus OR TI wuhan virus OR AB wuhan virus OR TI 2019nCoV OR AB 2019nCoV |
| S5 | TI ( CoV 2 or CoV2 or sarscov2 ) OR AB ( CoV 2 or CoV2 or sarscov2 )                                                                                                       |
| S6 | S1 OR S2 OR S3 OR S4 OR S5                                                                                                                                                 |
| S7 | (MH "Infant Mortality")                                                                                                                                                    |

|     |                                                                                                     |
|-----|-----------------------------------------------------------------------------------------------------|
| S8  | (MH "Infant Death")                                                                                 |
| S9  | (MH "Perinatal Death")                                                                              |
|     | TI ( ((infant* or baby or babies or neonat* or newborn* or perinat*) N3 (death* or mortalit*)) ) OR |
| S10 | AB ( ((infant* or baby or babies or neonat* or newborn* or perinat*) N3 (death* or mortalit*)) )    |
| S11 | (S7 OR S8 OR S9 OR S10)                                                                             |
| S12 | S6 AND S11                                                                                          |

## Appendix 2: Data Charting Form

### Data charting framework

| Main category                                                                        | Subcategory                         | Description                                                                                                                                                                |
|--------------------------------------------------------------------------------------|-------------------------------------|----------------------------------------------------------------------------------------------------------------------------------------------------------------------------|
| <b>Titles</b>                                                                        |                                     |                                                                                                                                                                            |
| <b>Authors</b>                                                                       |                                     |                                                                                                                                                                            |
| <b>Year of publication</b>                                                           |                                     |                                                                                                                                                                            |
| <b>Study Journal</b>                                                                 |                                     |                                                                                                                                                                            |
| <b>Study Citation Details</b>                                                        |                                     |                                                                                                                                                                            |
| <b>Study objective(s)</b>                                                            |                                     | Describe the stated objectives of the studies included in the review                                                                                                       |
| <b>Study Design</b>                                                                  |                                     | Specify the types of studies included in the review                                                                                                                        |
| <b>Study Setting</b>                                                                 |                                     | Specify the geographical areas covered by the studies included in the review<br>Specify the level of medical facility in each study included in the review                 |
| <b>Study Population/Sample size</b>                                                  |                                     | Describe the study population and specify the number of participants included in each study                                                                                |
| <b>Eligibility Criteria</b>                                                          |                                     | Specify the inclusion and exclusion criteria of each study included in the review                                                                                          |
| <b>Study period</b>                                                                  |                                     | Specify the time period of data collection of each studies included in the review<br>Specify the stage/wave of the pandemic during which each included study was conducted |
| <b>Reported primary outcomes (neonates &lt;28 days and infants &lt;1 year-old)</b>   | Frequency of ED visits              | Specify the frequency of ED visits before and during the COVID-19 pandemic                                                                                                 |
|                                                                                      | Main Reason(s) for ED visits        | Describe the main reasons for ED visits before and during the COVID-19 pandemic                                                                                            |
| <b>Reported secondary outcomes (neonates &lt;28 days and infants &lt;1 year-old)</b> | Change in mortality                 | Specify if there was an increase or decrease of neonatal/infant mortality during the COVID-19 pandemic compared to pre-pandemic                                            |
|                                                                                      | Causes of mortality                 | Describe the main causes of mortality before and during the COVID-19 pandemic                                                                                              |
|                                                                                      | ED visit length                     | Specify the ED visit length (in hours) during the COVID-19 pandemic compared to pre-pandemic                                                                               |
|                                                                                      | NICU/PICU/HDU admission             | Specify the NICU/PICU/HDU admission rate before and during the COVID-19 pandemic                                                                                           |
|                                                                                      | Reasons for NICU/PICU/HDU admission | Describe the main reasons for NICU/PICU/HDU admission before and during the COVID-19 pandemic                                                                              |

|  |                                    |                                                                                                          |
|--|------------------------------------|----------------------------------------------------------------------------------------------------------|
|  | NICU/PICU/HDU length of stay       | Specify the NICU/PICU/HDU length of stay (in days) during the COVID-19 pandemic compared to pre-pandemic |
|  | Infant hospitalization             | Specify the infant hospitalization rate before and during the COVID-19 pandemic                          |
|  | Reasons for infant hospitalization | Describe the main reasons of infant hospitalization before and during the COVID-19 pandemic              |
